# Supplementary material for: One-pot synthesis of carbon-decorated FePt nanoparticles and their application for label-free electrochemical impedance sensing of DNA hybridization
Source: Royal Society of Chemistry journal article supplement (doi:10.1039/c3ra23303k), 2013-01-01
Supplement: c3ra23303k.pdf [file c3ra23303k.pdf]

### Supporting information

One-pot synthesis of carbon-decorated FePt nanoparticles and their application for  
label-free electrochemical impedance sensing of DNA hybridization

Libin Wang<sup>a,b</sup>, Xiuwen Zheng<sup>\*a,b</sup>, Wei Zhang<sup>\*a,b</sup>, Xianqing Quan<sup>c</sup>, Qitu Hu<sup>a</sup>,

Wenjie Wu<sup>a</sup>, Peisong Zong<sup>a</sup>, Mingzai Wu<sup>d</sup>

<sup>a</sup>School of Chemistry and Chemical Engineering

<sup>b</sup>Key Laboratory of Resources & Environmental Analytical Chemistry in University  
of Shandong, Linyi University,

<sup>c</sup>College of Life Science

Linyi University, Linyi, Shandong, 276000, P.R.China

Tel(Fax): +86-539-8766600

<sup>d</sup>School of Physics and Materials Science

Anhui University, Hefei 230039, P.R.China

\*E-mail: xwzheng1976@gmail.com; zhangweiqust@126.com

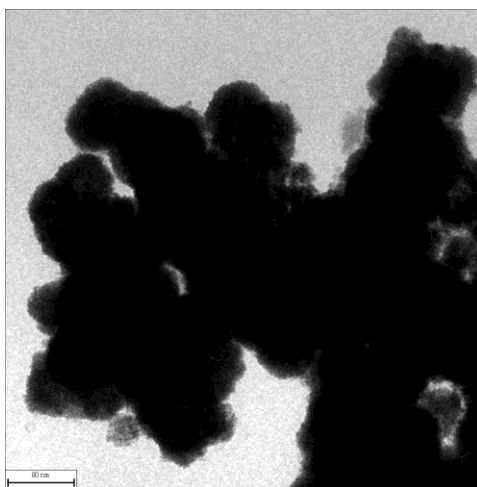

Figure S1. TEM image of aggregated FePt NPs, without the assistance of CNTs or GO

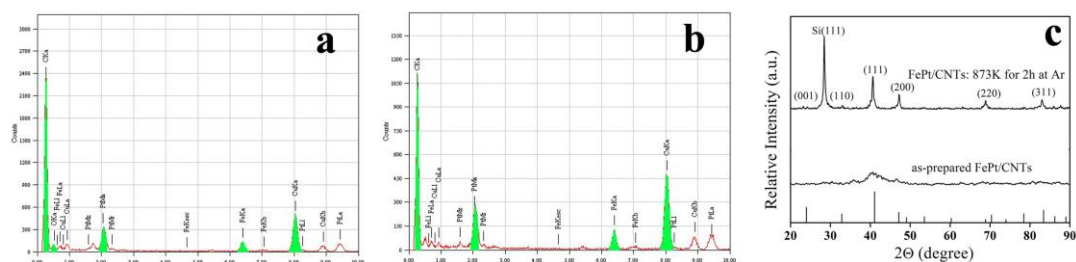

Figure S2. EDS analysis of as-prepared samples, revealing the atom ratio of Fe to Pt (a)45:55 for FePt/CNTs (b)48:52 for FePt/GO (c) XRD pattern for FePt/CNTs, indicating a chemically disordered fcc structure for as-prepared and chemically ordered fct structure for annealed samples.

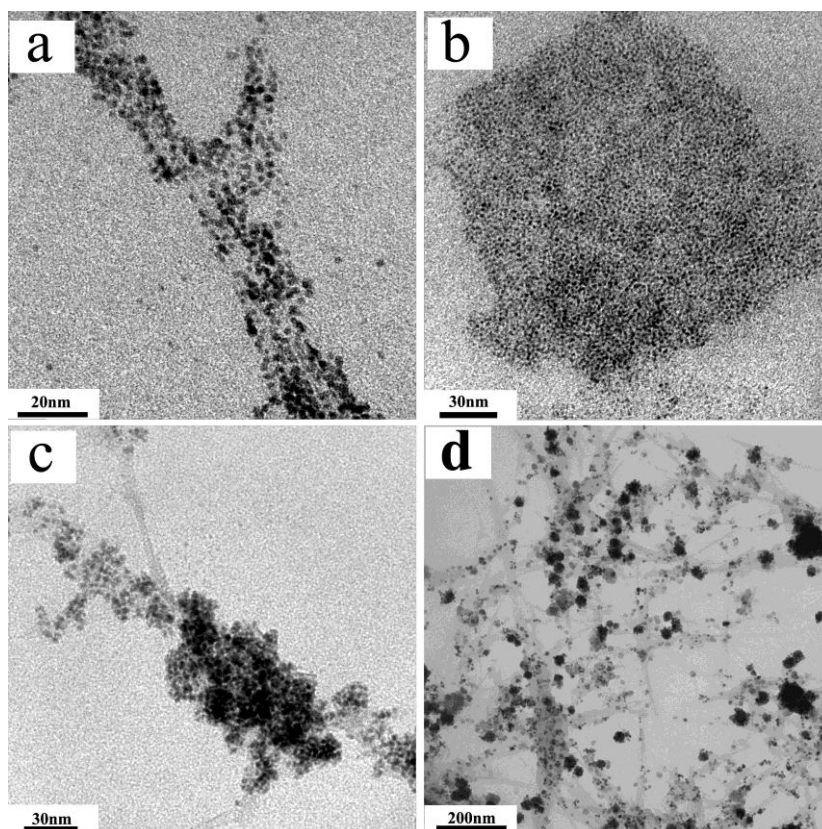

Figure S3. The influence of solvents on the morphology and density of as-prepared samples(a)FePt/CNTs and (b)FePt/GO using EG as solvent and reducing agent.(c) FePt/CNTs,using DMSO as solvents and EG as reducing agent. (d) FePt/CNTs, using OAm and OA as solvents and EG as reducing agent.

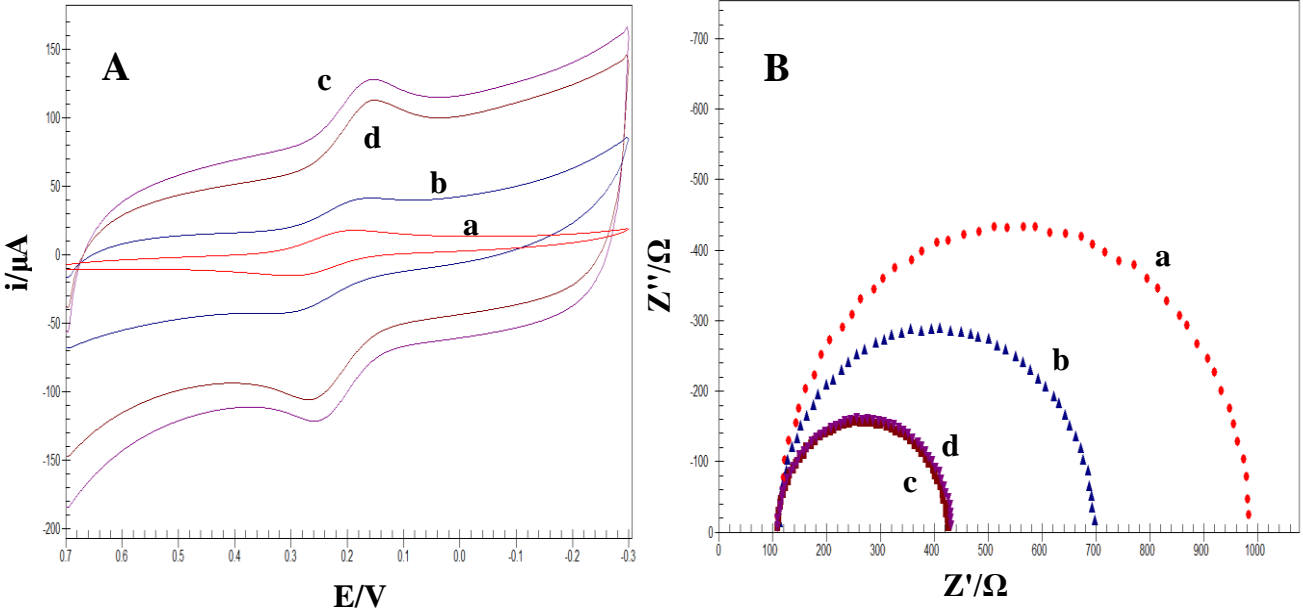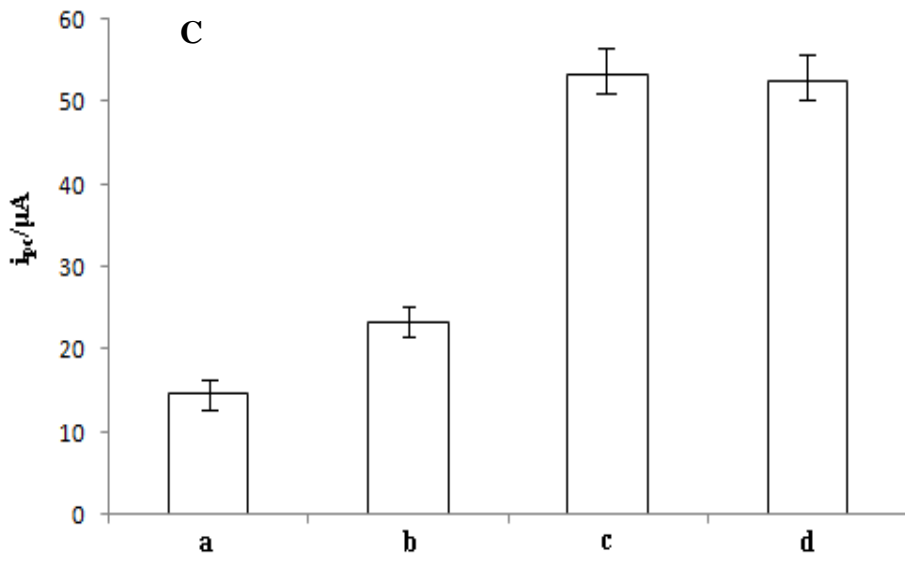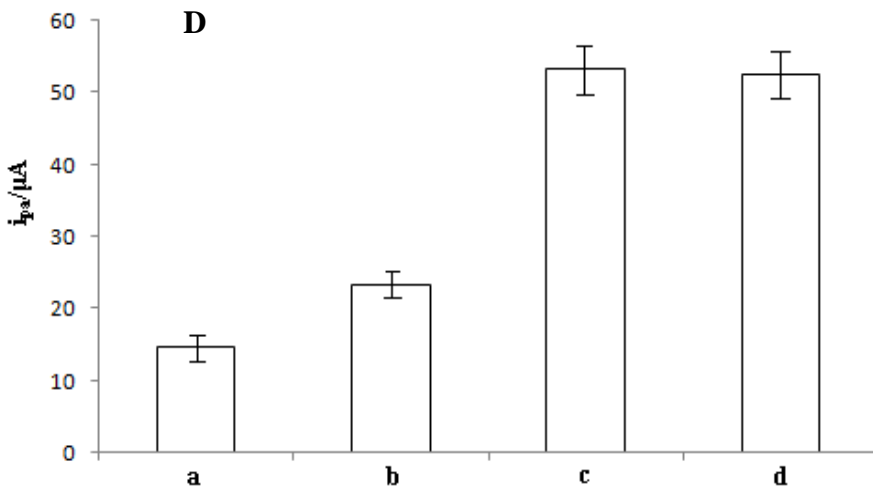

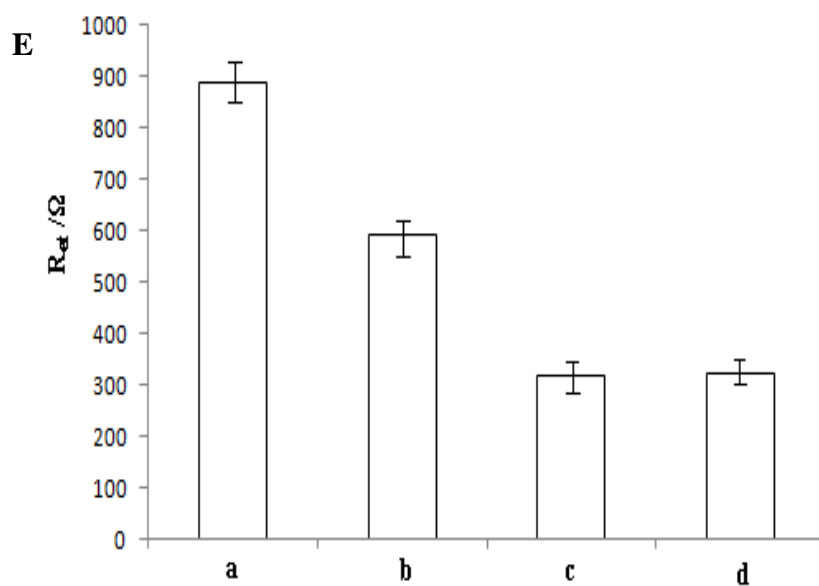

Figure S4. CVs (A) and Nyquist diagrams (B) of 1.0 mM  $[\text{Fe}(\text{CN})_6]^{3-/4-}$  recorded at (a) bare GCE, (b) FePt/GCE, (c) FePt/CNTs/GCE and (d) FePt/GO/GCE. The histograms of above CV (C, D) and EIS (E) results.

| electrode                                | $R_{et}$ value/ $\Omega$ |
|------------------------------------------|--------------------------|
| GCE                                      | 885                      |
| FePt/GCE                                 | 592                      |
| FePt/CNTs/GCE                            | 317                      |
| FePt/GO/GCE                              | 320                      |
| ssDNA/FePt/CNTs/GCE                      | 1120                     |
| dsDNA/FePt/CNTs/GCE                      | 2250                     |
| ncDNA/FePt/CNTs/GCE                      | 1160                     |
| single-base mismatched DNA/FePt/CNTs/GCE | 2000                     |
| double-base mismatched DNA/FePt/CNTs/GCE | 1450                     |
| ssDNA/FePt/GO/GCE                        | 1220                     |
| dsDNA/FePt/GO/GCE                        | 2680                     |
| ncDNA/FePt/GO/GCE                        | 1250                     |
| single-base mismatched DNA/FePt/GO/GCE   | 2350                     |
| double-base mismatched DNA/FePt/GO/GCE   | 1590                     |

Table S1. The statistical result of  $R_{et}$  values with different modified electrodes

| electrode     | $i_{pa}$ value/ $\mu A$ | $i_{pc}$ value/ $\mu A$ |
|---------------|-------------------------|-------------------------|
| GCE           | 14.7                    | 14.9                    |
| FePt/GCE      | 23.1                    | 23.4                    |
| FePt/CNTs/GCE | 53.1                    | 53.5                    |
| FePt/GO/GCE   | 52.5                    | 52.9                    |

Table S2. The statistical result of  $i_p$  values with different modified electrodes
